# Supplementary material
Source: MDPI journal article supplement (https://www.mdpi.com/2227-9717/8/9/1058)
Supplement: s1 [file s1]

Article

# Molecular Identification and VOMs Characterization of *Saccharomyces cerevisiae* Strains Isolated from Madeira Region Winery Environments

Mariangie Castillo <sup>1</sup>, Emanuel da Silva <sup>2</sup>, José S. Câmara <sup>1,3,\*</sup> and Mahnaz Khadem <sup>2,4</sup>

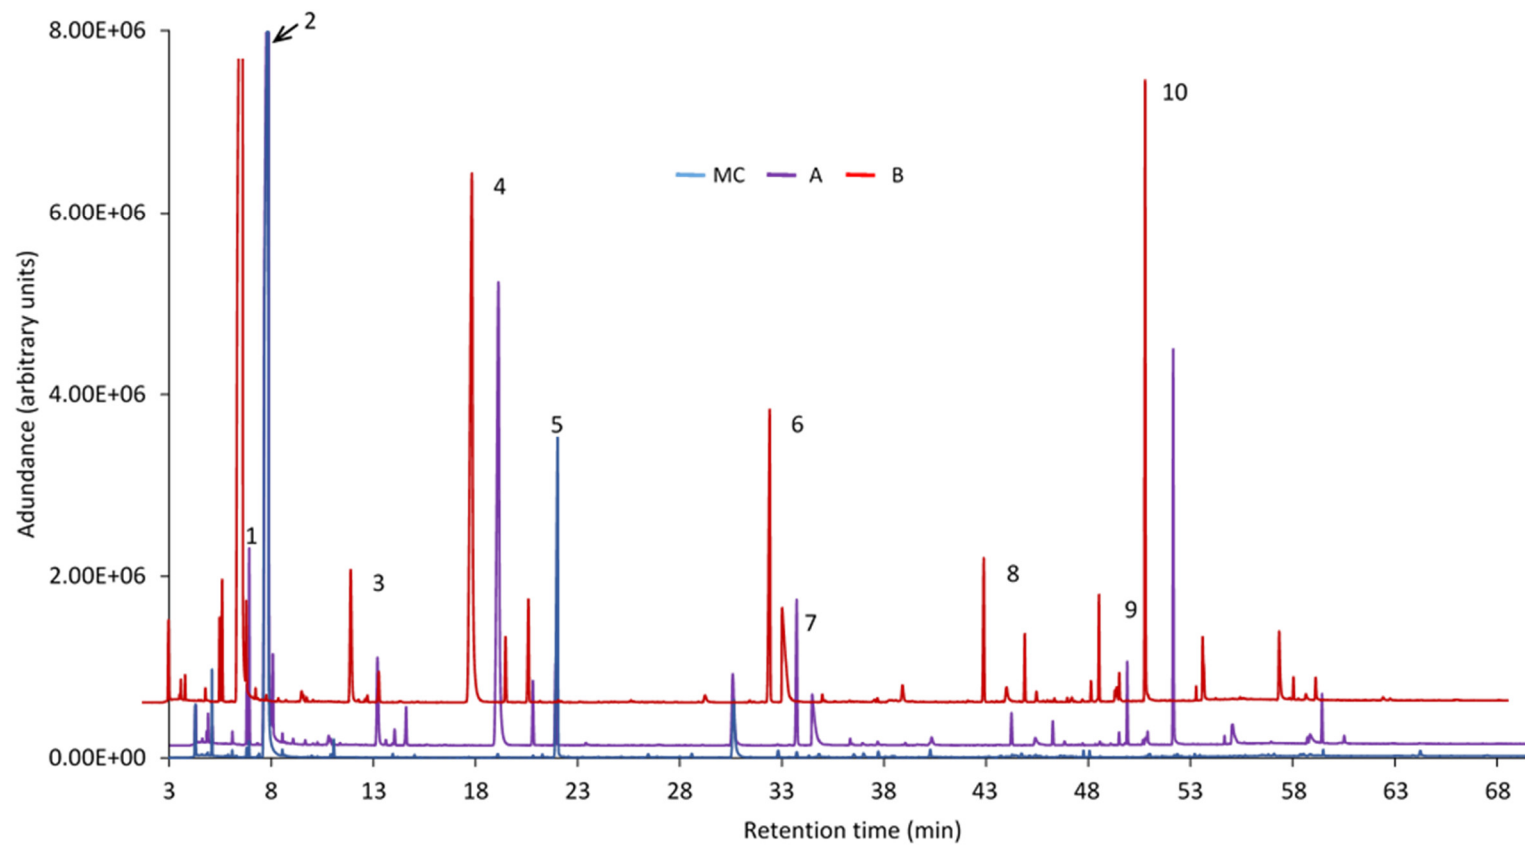

**Figure 1.** GC-MS overlay chromatograms from: MC-concentrate must (diluted), A strain and B strain. Major peaks: 1- Ethyl acetate; 2- Ethanol; 3- 2-Methyl-1-propanol; 4- 2-Methyl-1-pentanol; 5- 3-Octanone; 6- Ethyl octanoate; 7- Acetic acid; 8- Ethyl decanoate; 9- 2-Phenylethyl acetate; 10- Phenylethyl alcohol.
